# Supplementary material for: Carboxymethyl Cellulose (CMC) Optical Fibers for Environment Sensing and Short-Range Optical Signal Transmission
Source: PubMed Central journal article supplement (PMC8778620; doi:10.1021/acsami.1c22227), 2022-01-08
Supplement: am1c22227_si_001.pdf [file am1c22227_si_001.pdf]

## Supporting Information

# 1 2 Carboxymethyl Cellulose (CMC) Optical Fibers for 3 Environment Sensing and Short-range Optical Signal 4 Transmission

5 *Aayush Kumar Jaiswal<sup>\*1</sup>, Ari Hokkanen<sup>2</sup>, Markku Kapulainen<sup>2</sup>, Alexey Khakalo<sup>1</sup>, Nonappa<sup>3</sup>,*

6 *Olli Ikkala<sup>4</sup>, Hannes Orelma<sup>1</sup>*

7 <sup>1</sup>Biomaterial Processing and Products, VTT Technical Research Centre of Finland Ltd., Tietotie

8 4E, 02044 Espoo, Finland

9 <sup>2</sup>Microelectronics, VTT Technical Research Centre of Finland Ltd., Tietotie 3, 02044 Espoo,

10 Finland

11 <sup>3</sup>Faculty of Engineering and Natural Sciences, Tampere University, P.O. Box 541, 33101

12 Tampere, Finland

13 <sup>4</sup>Department of Applied Physics, Aalto University, P.O. Box 15100, 00076 Espoo, Finland

14 Email: aayush.jaiswal@vtt.fi

15 KEYWORDS: cellulose, optical fibers, sensors, respiratory sensors, green photonics, biosensors

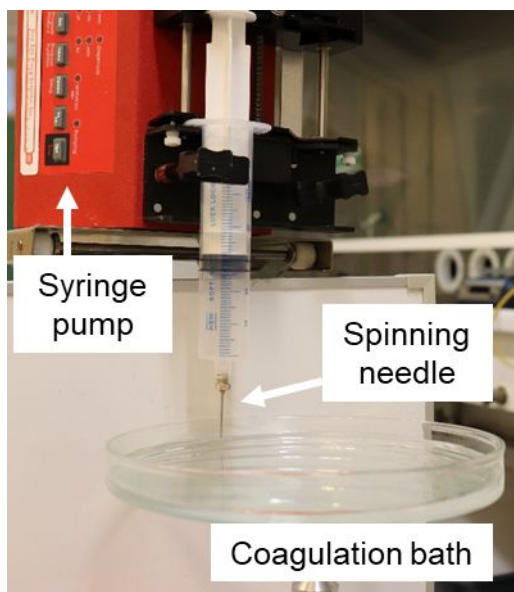

16

17 Figure S1. Image of the CMC fiber preparation setup. Fibers were fabricated via wet-spinning in  
18 a vertical configuration.

19 Figure S1 shows an image of the fiber spinning step. The syringe pump pushes the spinning dope  
20 contained in the syringe through a spinning needle and as a filament into a coagulation bath. The  
21 coagulation bath rotates at slow speed to enable fiber collection for further washing and drying.

22 Prior to fiber spinning, rheological behavior of CMC aqueous solutions was analyzed and the  
23 properties of 3% and 5% CMC solutions were compared. Rheology measurements were performed  
24 using a stress-controlled rotational rheometer Physica MCR 301 (Anton Paar GmbH) using a vane-  
25 cylinder geometry (STV-22, Anton Paar GmbH; vane span: 22 mm, cup diameter 29.29 mm). The

26 vane was fully immersed into the cylinder filled with the sample fluid while maintaining 1 mm  
 27 vertical gap between the vane and the cylinder. Firstly, forward shear sweeps were performed in  
 28 the shear rate range of 1-300 s<sup>-1</sup> (Figure S2a). Higher shear rates could not be achieved using the  
 29 measurement setup due to the onset of Weissenberg effect (rod climbing). Subsequently, to  
 30 ascertain the gelling nature of the CMC solutions, oscillatory amplitude sweeps were performed  
 31 in the strain range of 1-200% while keeping the angular frequency constant at 10 rad.s<sup>-1</sup>. Storage  
 32 moduli (G') and loss moduli (G'') of 3% and 5% solutions were measured and are shown in Figure  
 33 S2b.

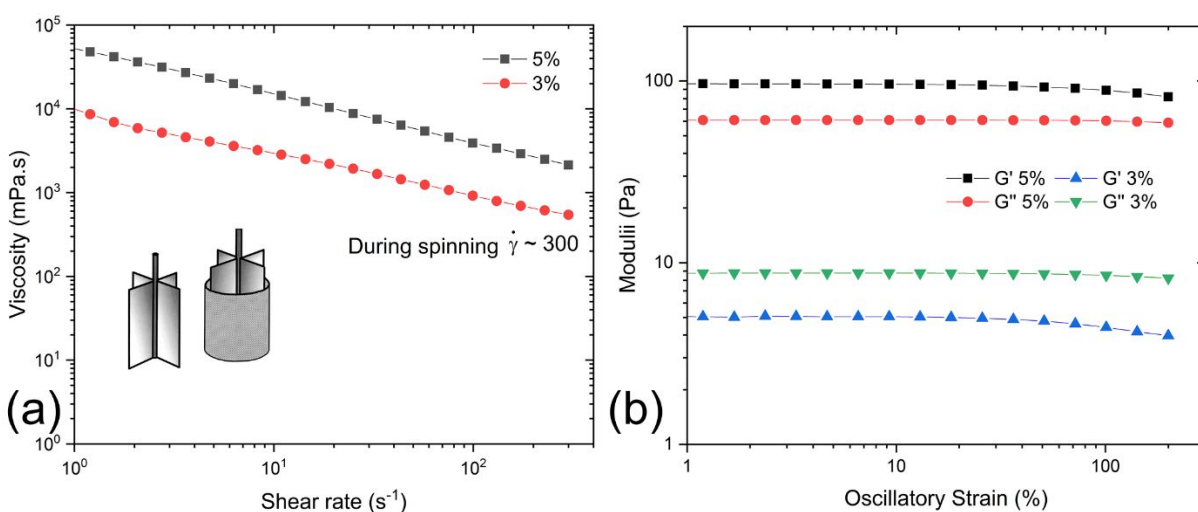

34  
 35 Figure S2: Rheological behavior of CMC aqueous solutions at 5% and 3% w/w concentration. (a)  
 36 shows forward shear flow curves and (b) shows amplitude sweep curves at fixed angular frequency

37 of 10 rad/s. Both measurements were performed using a cylinder-vane geometry (depicted in inset  
38 of subfigure (a)).

39 Both 3% and 5% CMC solutions exhibited high viscosity along with a shear-thinning nature  
40 (Figure S2a). The shear rate at the wall applied on the solutions during extrusion from the spinning  
41 needle was approximated using the Hagen-Poiseuille equation:

$$42 \quad \dot{\gamma} = \frac{32Q}{\pi D^3} \quad (1)$$

43 where  $\dot{\gamma}$  is the shear rate ( $s^{-1}$ ),  $Q$  is the volumetric flow rate ( $m^3.s^{-1}$ ), and  $D$  is the inner diameter of  
44 the spinning needle (m).

45 It must be noted that the Hagen-Poiseuille equation holds valid only for Newtonian fluids in an  
46 ideal flow whereas the CMC solutions show a non-Newtonian behavior. However, the equation  
47 was used to calculate an approximate value of shear rate induced on the fluid during the spinning  
48 process. For 15G and 16G spinning needles, the shear rate at the wall can be calculated to be 268  
49 and  $399 s^{-1}$  using Equation (1). At such shear rates, the apparent viscosity of the CMC solutions  
50 are already 10 times lower than the zero-shear viscosity.

51 From Figure S2b, it can be observed that the 5% CMC solution exhibited highly gel-like nature  
52 (phase angle =  $32^\circ$ ) and there was no crossover point observed even until the exertion of 200%

53 strain on the sample. However, the gelling nature was absent in the 3% solution where the loss  
54 modulus was found to be higher than the storage modulus (phase angle =  $61^\circ$ ), thus indicating that  
55 the solution concentration lies below the gel-point concentration.

56 Figure S3 shows the stress-strain curves for the 15G, 16G, and 22G fiber samples measured in  
57 the tensile direction. The thinner 16G fibers ( $280 \pm 37 \mu\text{m}$  diameter) elongated less than the thicker  
58 15G fibers ( $323 \pm 16$ ) before failure and were slightly weaker in terms of ultimate tensile strength.  
59 The thinnest 22G fiber ( $\sim 125\mu\text{m}$  diameter) were extremely weak in comparison to the other  
60 samples and hence not used during sensing experiments.

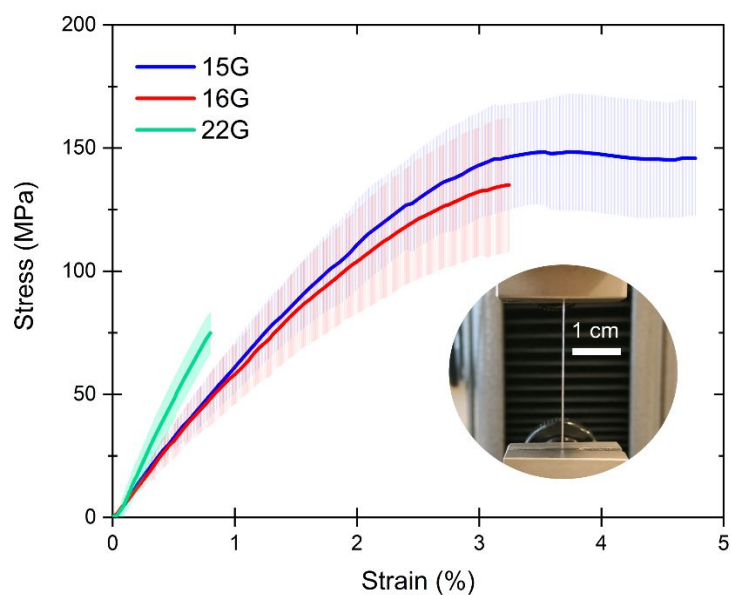

61  
62 Figure S3. Stress-strain curves for 15G and 16G fiber samples along with their respective standard  
63 deviations.

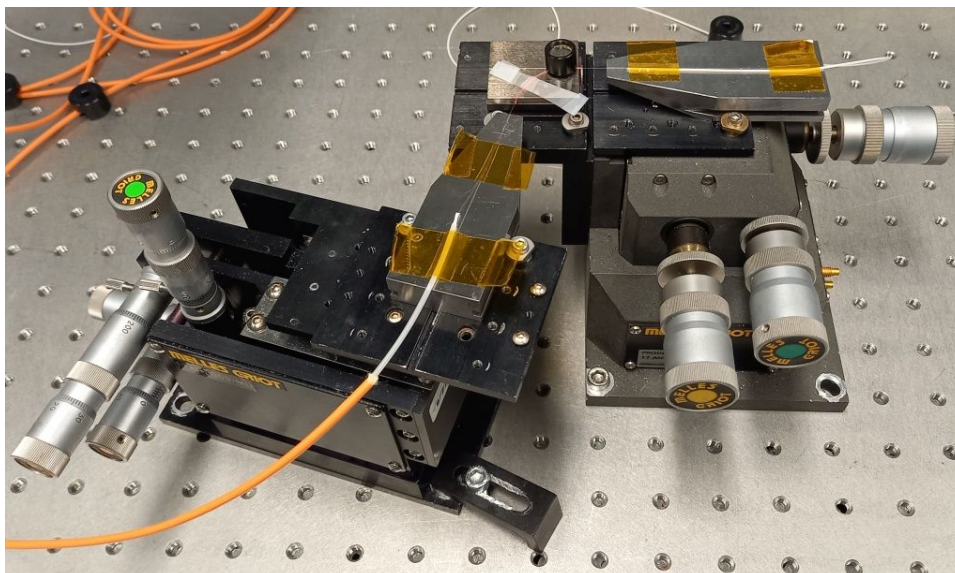

64

65 Figure S4. Experimental setup for light transmission and attenuation measurements.

66 Figure S4 shows the experimental setup for light transmission and attenuation measurements.

67 The measurement protocol has been described in the Methods section of the main text.

68 Figure S5 and S6 show the results obtained from the EDX analysis of the fiber samples. The

69 elemental analysis naturally showed that carbon and oxygen are the most dominant elements, along

70 with the presence of sodium and aluminum. Sodium presence is explained by the fact that a sodium

71 salt of CMC was used in the study. Aluminum was found to be homogenously distributed in the

72 fiber bulk, even near the center, indicating that  $Al^{3+}$  ions were able to penetrate rapidly into the

73 CMC hydrogel bulk and participate in cross-linking the hydrogel.

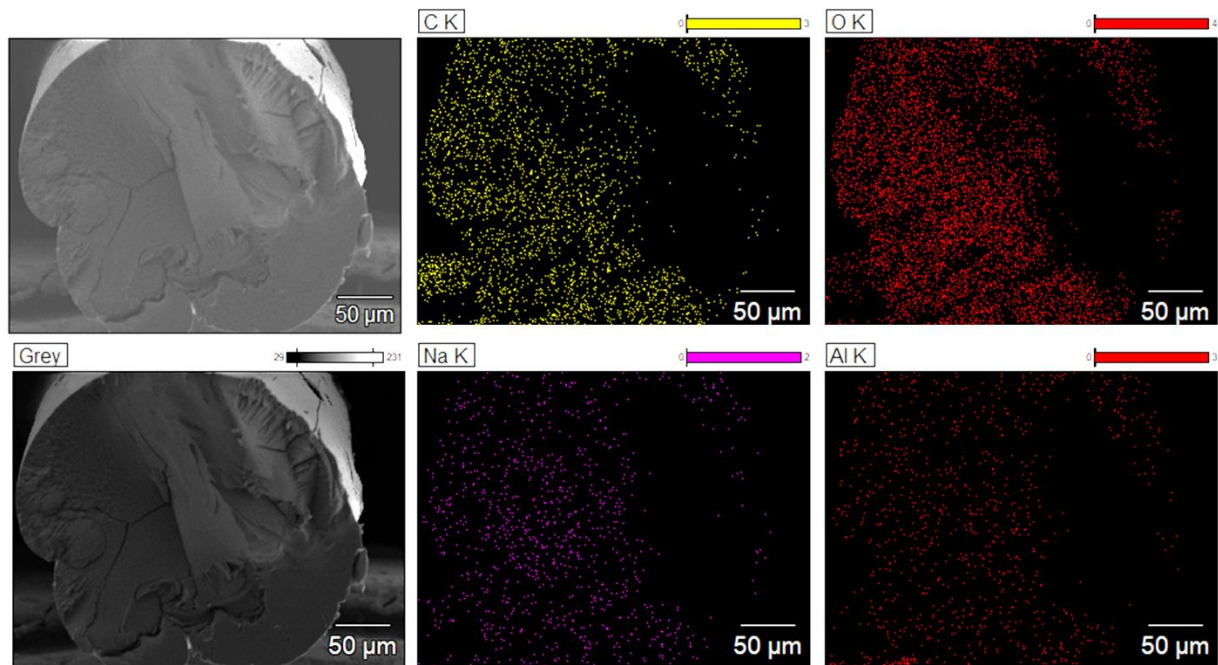

74

75 Figure S5. SEM-EDS elemental maps for the 16G fiber sample. The identified elements which are

76 mapped are carbon, oxygen, sodium, and aluminium. The SEM image is also shown in greyscale.



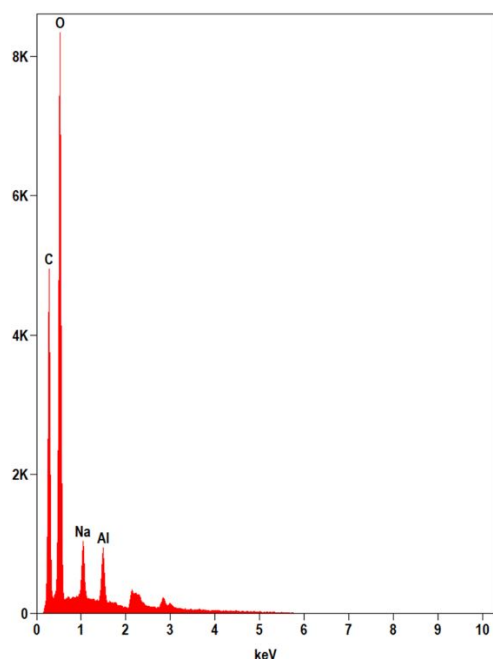

77

78 Figure S6. Relative elemental concentrations measured from the cross-section of the 16G fiber

79 sample via EDX.

80 Characterization of the CMC used in the study was also performed, using ATR-FTIR

81 spectroscopy and Thermogravimetric Analysis (TGA) and Dynamic Scanning Calorimetry (DSC).

82 The experimental protocol for ATR-FTIR has been described in the main text under the Methods

83 section. TGA and DSC measurements were performed in open alumina pans surrounded by air in

84 the range of 50-600 °C and 50-300°C, respectively. The heating rate was fixed at 5 °C/min and the

85 instrument was a Netzsch STA 449 F1 Jupiter (Netzsch-Gerätebau GmbH, Germany)

86 thermogravimetric analyzer. The measurements were performed at least twice.

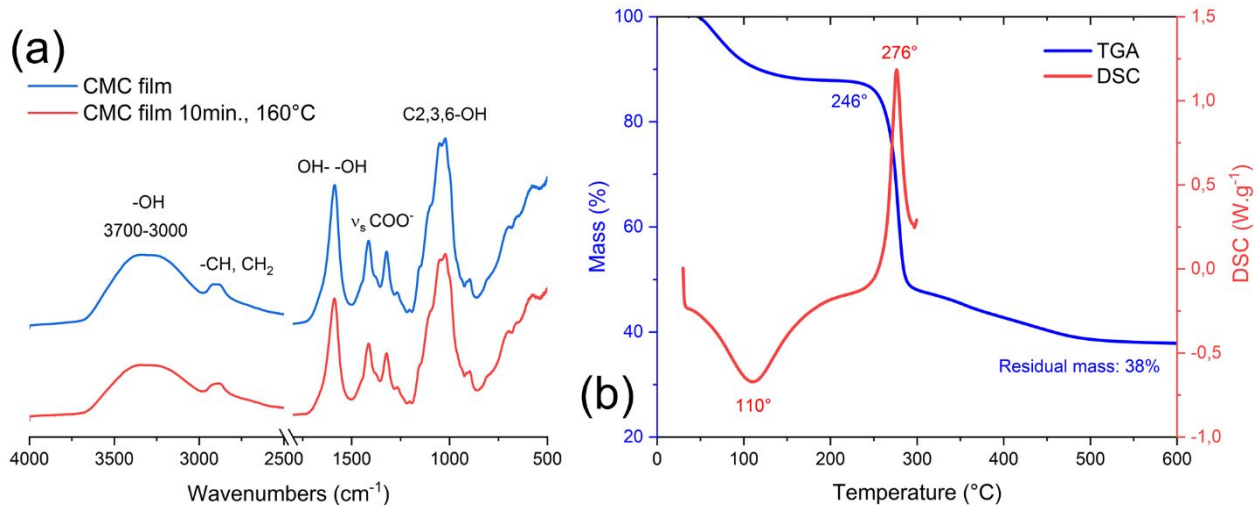

87  
 88 Figure S7. (a) FTIR spectra for CMC films ( $100 \text{ g/m}^2$ ) before and after heat treatment at  $160^\circ\text{C}$  for  
 89 10 minutes. (b) TGA and DSC curves for CMC powder measured in air.

90 Figure S7a shows the FTIR spectra for  $100 \text{ g/m}^2$  films prepared via solvent casting of CMC  
 91 solutions at a basis weight of  $100 \text{ g/m}^2$ . Spectra were taken before and after heat treatment ( $160^\circ\text{C}$   
 92 for 10 min.) of the film to observe any chemical changes in CMC. All characteristic bands of CMC  
 93 are present in the spectra both before and after treatment. The bands at  $1600$ ,  $1416$ ,  $1324 \text{ cm}^{-1}$   
 94 correspond to the  $\text{COO}^-$  vibrations. No spectral change was observed upon the heat treatment.

95 Figure S7b shows the TGA and DSC curves for CMC powder in air. The TGA curve showed  
 96 two decaying periods, first upon the loss of moisture from the sample, and the second upon  
 97 combustion of volatiles in the sample. The endothermic peak of the DSC curve was seen at  $\sim 110$

98 °C which marked complete dehydration of the sample. Upon further heating, the curve starts  
99 moving towards the exothermic direction where the exothermic peak was seen at ~276 °C.

100 Figure S8 shows SEM images of fiber cross-sections for 15G and 22G samples where twisting  
101 in the fiber is apparent in the image of the 15G fiber. It must be noted that twisting occurs  
102 intermittently, arising from shrinkage forces experienced by the hydrogel while drying if the fiber  
103 formation is non-uniform. As the fiber diameter decreases i.e., in the case of the 22G fibers  
104 (smallest diameter in the current study), the twisting tendency seems to reduce.

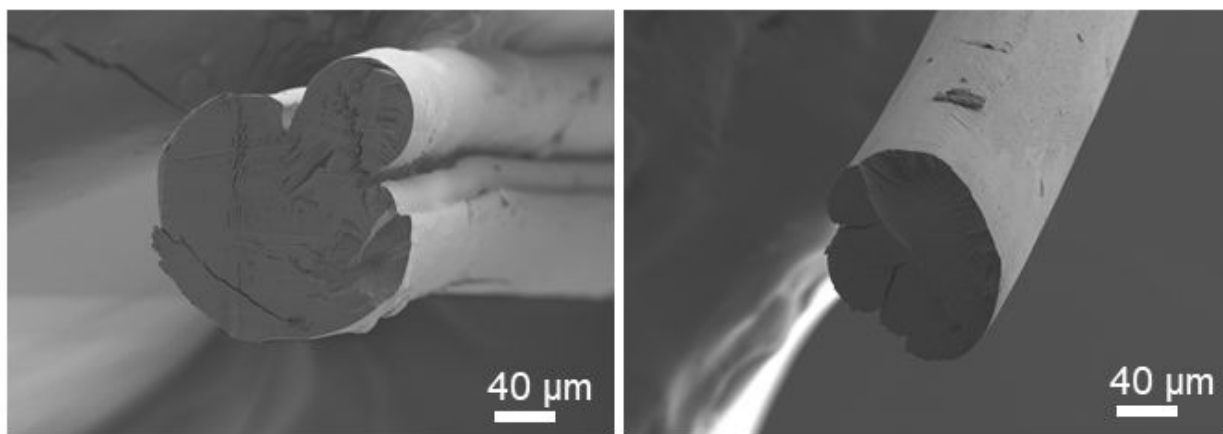

105  
106 Figure S8. SEM images of fiber cross-sections for 15G (left) and 22G (right) samples at 270X  
107 magnification.
